# Supplementary material for: Measuring (subglacial) bedform orientation, length, and longitudinal asymmetry – Method assessment
Source: PLoS One. 2017 Mar 20;12(3):e0174312. doi: 10.1371/journal.pone.0174312 (PMC5358869; doi:10.1371/journal.pone.0174312)
Supplement: S1 Table — Errors correspond to the difference between the values from the automated method and from the reference LA. For length and longitudinal asymmetry, errors correspond to the % difference relative to value derived from the reference LA. (XLSX) [file pone.0174312.s002.xlsx]

## Sheet: Sheet1
	Signed orientation difference (º)						Signed % length difference							Signed % ASPL_A difference
Drumlin ID	LSL	LSL-IP	RLA	SDE1	SDE2	SDE3	LSL	LSL-IP	RLA	SDE1	SDE2	SDE3	Euler Length	LSL	LSL-IP	BLS	SDE1	SDE2	SDE3
0	11.1	11.6772	1.7	7.1	4.5	4.4	1.30324	1.28598	-0.0430785	0.412015	0.0718869	0.0742185	-4.70486	-0.148781	-0.182996	0.00464322	0.103259	-0.00105573	0.0116634
2	-9.7	-1.38389	-1.9	-2.5	0.4	0.1	0.850576	-16.5553	-0.0601186	-0.0569253	0.0258131	0.00773118	7.25709	2.80803	-19.9701	0.136594	0.14964	0.185835	0.253764
3	-20.8	-21.4753	-3.8	-11	-6.6	-6.4	4.26894	3.9869	-0.215498	0.546487	-0.0828458	-0.180372	6.98089	-1.81931	-2.30266	0.131726	-0.661443	-0.15078	-0.0692508
4	-3.4	-2.02947	1.1	-0.1	-1.6	-1.6	0.294132	-0.739979	-0.0205538	0.00616552	0.093266	0.0928451	-6.72506	-0.139865	1.19324	0.0903705	0.0546329	0.0944327	-0.0546751
5	2.3	2.38396	-2.3	-0.5	0.2	0.1	0.245279	0.168033	-0.0825689	-0.0352753	0.0159505	0.00789316	-5.9589	0.205985	0.0518371	0.243767	0.125634	0.0181092	0.0890184
6	5.9	6.75076	-7.9	1.6	-0.5	-0.4	2.01836	1.13691	-0.957643	0.393098	-0.0913122	-0.092461	-1.8494	-0.543473	-0.695337	-11.5451	0.124036	0.342352	0.123219
7	0	-3.72594	3.4	-0.7	-1.9	-3.6	-0.509037	-1.91888	-0.176168	0.0859843	0.262788	0.573044	-3.75429	-6.42494	2.68574	-0.635893	-0.278191	-0.168295	0.768674
9	-1.2	-3.61213	1.2	-3.1	-1.1	-1.4	0.0627075	-1.38122	-0.0210325	0.242049	0.0556918	0.0729323	-5.3849	0.216802	2.1473	-0.0596339	0.0759783	-0.04325	0.0454438
10	5.9	5.28924	-0.2	2	1	0.5	0.475864	0.387002	-0.000638026	0.0787419	0.0246383	0.00608619	-2.79858	-0.636374	-0.697271	-0.0014798	-0.119417	-0.0978048	-0.0931272
11	0	0.559776	-5.4	-0.9	-1.3	-2	-0.115668	-0.837193	-0.444931	-0.126951	-0.178316	-0.265164	-4.10987	-0.165937	-1.25606	0.556616	0.221946	-0.168044	-0.294486
13	-0.9	3.15868	-1.8	-0.9	0.9	1.3	-0.037755	-1.81375	-0.049565	-0.0339651	0.0642459	0.100067	-1.13519	-0.0902079	-2.75233	0.0960957	0.0590713	-0.149946	0.0760359
14	-17.6	-19.5919	0.2	-9	-4.8	-4.9	5.08052	-2.60303	-0.00121278	1.27774	0.39613	0.387864	15.9527	-0.740148	5.56035	-0.00829783	-1.1525	-0.176865	-1.19559
15	-5.8	-7.36289	-2.5	-1.9	-2.3	-2.8	0.0197981	-7.18131	-0.0910155	-0.0885227	-0.0904683	-0.0884939	-0.960689	-1.15396	3.52088	-0.113136	-0.0808105	-0.0990164	-0.11765
17	-12.8	-8.82453	-1.6	0	-4.6	-4.9	1.88693	-1.66589	-0.0398219	0.00489733	0.0909184	0.114546	5.55969	-2.62342	1.06709	-0.13634	-0.0319132	-0.250328	-0.397073
19	2.4	2.10439	-3.8	6.5	4	2.5	0.370089	0.195125	-0.224486	1.44425	0.699924	0.39758	2.89042	0.68478	0.910898	0.82609	3.54166	1.14488	-0.0835507
20	-2.3	-1.75926	0.5	-0.8	-1.8	-2.3	0.114663	-1.84912	-0.00280324	0.0226573	0.0796364	0.107625	-2.95601	-0.48503	-0.108765	0.108651	-0.0920872	-0.242289	0.0857069
21	11.4	9.67994	1.6	3.5	0.8	1.3	1.45139	0.183966	-0.0385474	0.0224005	-0.0280792	-0.0374242	-2.17433	0.938684	-0.799216	-0.131278	-0.134895	-0.135938	-0.155354
22	2.8	4.23419	-1.4	0.3	-0.1	-0.2	0.240103	-1.08787	-0.0289782	0.0201859	-0.00474382	-0.00396805	-3.71622	-0.147696	-2.41003	0.311599	0.201138	0.270381	0.25436
23	7	-8.54815	1.7	2.2	1.5	0.5	0.156675	-12.4577	-0.0396081	-0.0338402	-0.0396198	-0.0174973	2.35058	2.70014	-18.0564	0.221808	0.29977	0.206576	-0.194705
24	3.1	6.07398	-2	2.7	1.9	2.1	0.339054	-1.69045	-0.0601821	0.267831	0.167689	0.19495	-5.60117	0.812829	3.45825	-0.053528	0.222118	0.228065	0.413712
25	-4.9	-6.6556	1	-3.5	-4.4	-4.9	0.515184	-0.0901016	-0.0152749	0.273877	0.448608	0.514079	-0.793871	-0.0763241	-0.718304	0.0446462	-0.0288519	-0.558471	-0.284616
26	4.9	6.66308	0.4	3.8	4.5	4.6	0.315482	-0.401746	-0.00229655	0.170957	0.26378	0.262583	-5.34612	0.62633	1.88271	0.0096844	0.179134	0.291306	0.302677
29	-12.7	-13.4698	-7.1	-8.2	-8.8	-9	-0.281797	-0.769462	-0.764488	-0.742615	-0.72263	-0.709435	-2.54621	-0.050325	-0.750331	0.508968	0.264962	0.361393	0.191054
31	0.5	3.67445	-3.9	-0.2	-0.1	1.5	0.0588973	-7.93066	-0.235397	-0.0266257	-0.0145168	0.161407	-5.35062	0.472127	7.81902	-0.284183	-0.0863667	-0.143945	0.647817
34	10.4	11.2798	-2.1	6.3	6.7	6.8	1.60791	1.32698	-0.0712128	1.01187	1.13769	1.15258	2.35287	-1.32395	-1.26059	0.272215	-1.84381	-1.54369	-3.20119
35	-6.8	-1.02293	-3	-2.7	4.3	4.2	0.0748755	-19.6514	-0.137747	-0.134973	0.663734	0.655638	17.9237	3.0844	-28.1332	1.28963	1.25236	0.30267	0.223533
36	26	0.069179	0	-1.4	3.6	4	4.51273	1.80674	0.000113744	0.00633386	0.226279	0.220346	14.2867	10.3568	10.6931	2.57482e-06	-0.0282453	-0.00656219	0.407282
37	-9.6	-13.8946	-3.6	-5.8	-4.5	-2.5	0.346435	-12.0353	-0.196442	-0.119347	-0.187072	-0.173486	3.60706	2.25717	13.5765	0.125509	0.282481	0.144469	-0.191908
39	-3.3	-2.39888	0.5	-0.8	-2.8	-2.8	0.207384	0.0298848	-0.00375193	0.020725	0.168278	0.166752	-4.04972	-0.0727957	0.12387	-0.019029	-0.0194805	0.00430436	-0.0323522
40	-11.3	-11.8445	-2.3	-12.9	-7.8	-7.4	1.20929	-0.371287	-0.0378526	1.63845	0.402734	0.337799	7.54864	-0.0208212	-1.01224	0.713836	0.526025	0.596751	0.256967
41	-6.7	-0.693025	0	-2.2	-2.3	-0.7	0.619596	-9.45183	0.000129987	0.0753993	0.077854	0.00580009	-2.37198	-1.33563	11.0838	4.84411e-06	-0.092995	-0.040551	-0.134052
42	-5.8	-5.94306	-8.7	-2.5	1.2	1.5	-1.02182	-1.06812	-1.14911	-0.369566	0.331917	0.117953	5.23905	1.32248	1.20946	1.20464	-1.75668	-0.908749	2.13742
44	19.9	-3.07791	1.8	4.6	5.3	4.9	1.94242	-5.529	-0.0460647	0.0599914	0.124282	0.112246	7.8348	8.5657	-7.22624	0.268506	0.192192	0.246007	0.382354
45	-6.2	-4.01348	-2.4	-2.7	-1.5	-1.8	0.133199	-2.01597	-0.0862227	-0.0843746	-0.0726576	-0.0798798	-4.44974	-0.960162	1.66054	-0.654475	-0.679496	-0.556804	-0.560654
46	-3.1	2.16609	0.2	-0.7	-2	-2.5	0.171356	-1.65046	-0.000904488	0.613761	0.392762	0.313552	-1.16071	0.794376	2.53779	0.00590707	0.462919	0.457253	0.0532004
47	0.1	-1.04008	0.3	-0.3	-0.3	-0.8	-0.00103039	-3.91469	-0.00147873	0.00408217	0.00435103	0.0145043	-7.54824	-0.00771111	2.61237	-0.0343945	-0.00975685	-0.00997051	0.0679126
48	3.1	8.63033	1	3	2.7	0.8	0.0568152	-9.28732	-0.013106	0.0514854	0.0352616	-0.0127442	4.32545	0.559051	13.7301	0.0491757	0.181734	0.0555118	0.0113732
49	6.6	2.53768	10.6	4.4	8.3	9	-1.47198	-2.00149	-1.70953	-1.13952	-1.6201	-1.67266	-0.346702	0.463106	1.19931	-0.0141977	0.169785	0.402466	0.198907
50	-2	-3.90314	1.3	-2.3	-1.3	-1.3	0.140381	-1.51556	-0.0250905	0.164897	0.0800825	0.0750464	-5.34189	0.550181	1.47349	-0.0349551	0.134792	0.12738	0.352901
54	-4.6	-1.55994	-0.1	-0.8	-0.6	-1	0.262241	-3.32691	-8.64834e-05	0.00679923	0.00223282	0.0111807	-5.90219	0.444668	-3.67076	-0.00197756	0.023864	0.00570177	0.0869823
57	-3	-2.70936	1.9	0.3	-1.5	-1.6	0.296749	0.0427027	-0.0525488	-0.0111863	0.122906	0.123781	-4.43309	0.120351	0.402765	0.0342364	0.00948281	-0.0724724	-0.0487989
64	-1.7	0.954759	2.2	-0.4	-3	-2.9	0.164859	-5.70477	-0.0675524	0.0353195	0.325861	0.337116	-4.32501	-0.663504	5.59464	0.0892778	-0.220843	-0.476339	-0.56292
65	2.3	-2.21204	2.7	0.9	-2.3	-1.3	-0.107007	-1.82106	-0.10899	-0.0628606	0.282357	0.141936	-2.90126	0.221562	-2.62598	0.308847	0.210418	0.0770576	-0.49947
67	-1.4	1.89467	-1.6	-0.3	-1.8	-1.8	-0.0372542	-1.96064	-0.0376214	-0.0112583	-0.0373787	-0.0370976	-4.90892	0.00710884	1.64313	0.00182001	-0.0196076	0.00343944	0.00534751
70	4.7	3.93932	-0.1	2.4	0	-0.1	0.350338	-0.286917	-1.37781e-05	0.0967923	-8.45517e-05	-9.91503e-05	-6.1816	0.0919111	-0.835169	0.00516412	0.082853	0.00528129	0.00299076
71	3.4	3.86766	0.6	3.4	0.8	1.3	0.112437	-0.454602	-0.00480461	0.122539	-0.00439673	0.000577949	-3.28858	-0.417325	-1.22512	-0.138605	-0.326875	-0.159193	-0.126742
72	11	3.37159	1	8.8	7.4	7.4	1.52762	-16.4789	-0.0165243	0.926275	0.618277	0.609204	-2.4094	2.90803	-21.3849	0.0315241	0.589136	0.172787	0.584263
73	2.5	3.70703	-1.3	1.7	1.9	1.8	0.192959	-0.189451	-0.0238981	0.108059	0.132457	0.124191	-7.2507	0.242135	0.707006	-0.0109682	0.068507	0.152728	0.297755
76	-1.9	-2.22044	-2.3	-9.2	-0.7	-1.7	-0.0764582	-0.117938	-0.077989	0.487621	-0.0291052	-0.0756903	11.4769	-0.130382	-0.115674	-0.128602	0.404154	-0.0589997	-0.091003
78	4.5	-0.103884	3.4	2.2	0.9	0.5	-0.158823	-6.34842	-0.176308	-0.153761	-0.0775345	-0.0465818	-5.12912	0.432896	-7.6931	0.194855	0.146512	0.113982	-0.043577
80	-2.9	3.02833	0	-0.4	2.6	1.5	0.131921	-3.79764	0.000132251	0.0020327	0.0986852	0.0354597	-2.70947	-0.681372	4.54993	-4.15479e-06	-0.0165926	0.115763	0.186137
81	0.8	-0.594694	0.8	-0.2	0	-0.2	-0.00818087	-0.960643	-0.00806024	0.00390972	0.000665175	0.00658273	-7.0968	-0.0318597	-1.39814	-0.0334097	-0.0010445	-0.0419625	0.0434947
82	0.6	-0.442302	6	3.3	1.6	1.6	-0.268595	-9.52868	-0.550149	-0.444597	-0.256611	-0.381247	-6.29462	-0.669102	-10.3907	0.774296	0.453344	-0.0478012	0.0903972
83	14	3.1	7	2.6	2	2	-0.265303	-3.15855	-0.739922	-0.437955	-0.361189	-0.363167	4.13887	-2.13316	1.95253	-0.493383	-0.197636	-0.241705	-0.274161
84	-9.6	-6.36322	-5.4	-1.7	1.7	0.3	-0.178516	-1.24375	-0.449873	-0.212865	0.285554	0.0830316	-1.70517	-0.347206	0.863802	-0.117133	-0.0801684	-1.12122	0.709981
85	3.7	-4.4664	1.7	-0.9	-0.3	-0.2	0.0158077	-5.06385	-0.0420237	0.0506986	0.0189192	0.0178407	-0.048725	0.738014	-7.76028	-0.0332421	-0.192743	-0.0563542	-0.0719721
86	1.7	1.18233	1.1	0.4	0	0	-0.00917588	-0.0455616	-0.0157839	-0.00985684	0.0016222	0.00274888	-5.39764	-0.0627835	-0.010083	-0.0465314	-0.0383291	-0.050063	-0.036031
87	0.5	1.48612	-1.7	0.4	0.3	0.8	0.0303342	-0.542981	-0.0436105	0.01948	0.0138486	0.0463301	-6.37177	0.0590197	0.750794	-0.0718381	-0.0356027	-0.067217	0.0567759
88	8.1	4.37704	0.8	3	0.8	1.4	0.543454	-3.42109	-0.0115679	0.0664467	-0.0115942	-0.00849587	-1.71733	-1.90266	2.16474	-0.125875	-0.430513	-0.116895	-0.26707
89	-7.2	-1.18463	-0.1	-2.4	-0.6	-0.7	0.572697	-11.3187	-2.36383e-05	0.0771098	0.005246	0.00483398	-0.492735	1.13057	-14.8288	-0.00544265	0.00945207	-0.00618342	-0.00408602
90	-0.4	-0.869918	-5.1	-2.6	-1.1	-0.9	-0.107659	-0.308794	-0.385299	-0.294933	-0.1505	-0.122156	-6.73552	-0.144708	-0.41165	-0.52052	-0.427708	-0.521799	-0.235351
94	-1.6	-4.04268	3.7	0.6	3.9	1.6	0.225198	-0.203167	-0.204046	-0.0627403	-0.204015	-0.130711	0.519253	0.532194	1.13549	0.107732	0.0127009	0.129475	0.100976
98	-2.8	-1.05665	1.4	0.5	0.5	0.7	0.242271	-0.632297	-0.0311543	-0.0175953	0.0265268	-0.0230774	-3.35655	0.763922	0.709344	-0.0883006	-0.00427028	0.0883005	-0.0443988
99	4	5.58476	-0.3	2.3	1.9	1.8	0.266012	-2.17896	-0.000236877	0.0987265	0.0721111	0.0563896	-2.80455	0.48252	2.29659	0.00624844	-0.160398	-0.0964344	0.208523
